# Supplementary material
Source: PubMed Central journal article supplement (PMC3789346)
Supplement: CJN.06960712_CJN06960712SupplementaryData.pdf [file CJN.06960712_CJN06960712SupplementaryData.pdf]

**SUPPLEMENTARY DATA**

**Table I Supplementary data.** Correlation of participant characteristics ( $n = 567$ ) with Log baseline serum aldosterone levels using multivariate regression analysis <sup>a</sup>

| <b>Characteristics</b>                    | <b>Beta ± SD</b> | <b>p-value</b>          |
|-------------------------------------------|------------------|-------------------------|
| Females vs Males                          | + 0.13 ± 0.07    | 0.06                    |
| BMI                                       |                  |                         |
| < 25 kg/m <sup>2</sup>                    | Ref              | <i>p for trend 0.19</i> |
| 25–30 kg/m <sup>2</sup>                   | + 0.11 ± 0.07    | 0.10                    |
| > 30 kg/m <sup>2</sup>                    | + 0.11 ± 0.08    | 0.09                    |
| UACR (log mg/g)                           | - 0.09 ± 0.03    | < 0.01                  |
| Na Intake (Mann's Formula,<br>log mmol/d) | - 0.47 ± 0.09    | < 0.01                  |
| Serum potassium (mmol/l)                  | - 0.28 ± 0.06    | < 0.01                  |
| eGFR (mL/min/1.73 m <sup>2</sup> )        | - 0.005 ± 0.002  | < 0.01                  |

BMI, body mass index; NS, not significant; SD, standard deviation; UACR, urinary albumin creatinine ratio; eGFR, estimated glomerular filtration rate.

<sup>a</sup>Adjustment for age, ethnicity, smoking status, HbA1c, and antihypertensive treatments.

**Table IIa supplementary data.** Predictors of aldosterone breakthrough at 1 year (i.e. serum aldosterone level increase greater than 10% over baseline values) versus serum aldosterone decrease > 10% below baseline values, in the subgroup of participants with a decrease of sodium intake estimated by Mann's formula from baseline to 1 yr, using multivariate logistic regression analysis.

| <b>VARIABLES</b>                                                                | Model 1 <sup>a</sup>                                                                     | Model 2 <sup>b</sup>      |
|---------------------------------------------------------------------------------|------------------------------------------------------------------------------------------|---------------------------|
|                                                                                 | OR (95% CI)                                                                              | OR (95% CI)               |
| <b>Decrease sodium intake estimated by Mann's formula from baseline to 1 yr</b> |                                                                                          |                           |
|                                                                                 | Increase of serum aldosterone levels > 10% from baseline values (n=93 participants [%])  |                           |
|                                                                                 | vs                                                                                       |                           |
|                                                                                 | Decrease of serum aldosterone levels > 10% from baseline values (n=133 participants [%]) |                           |
| <b>Baseline characteristics</b>                                                 |                                                                                          |                           |
| Serum aldosterone (log mg/dL)                                                   | <b>0.27 [0.16-0.45]</b>                                                                  | <b>0.21 [0.12-0.38]</b>   |
| SBP (mmHg)                                                                      | 1.01 [0.99-1.03]                                                                         | 1.014 [0.98-1.04]         |
| Serum potassium (mmol/l)                                                        | 0.53 [0.28-1.01]                                                                         | 0.50 [0.25-1.03]          |
| <b>Significant decrease from baseline to 1 yr</b>                               |                                                                                          |                           |
| SBP (mmHg)                                                                      | –                                                                                        | 1.01 [0.99-1.03]          |
| Na intake (Mann's formula, log mmol/d)                                          | –                                                                                        | <b>12.49 [2.02-77.27]</b> |
| Serum potassium (mmol/l)                                                        | –                                                                                        | 0.85 [0.42-1.72]          |
| eGFR (log ml/min/1.73 m <sup>2</sup> )                                          | –                                                                                        | 3.43 [0.81-14.58]         |
| <b>ARB treatment</b>                                                            |                                                                                          |                           |
| Losartan versus Telmisartan                                                     | –                                                                                        | 1.22 [0.65-2.30]          |

<sup>a</sup> Adjustment for baseline age, sex, ethnicity, sodium intake, UACR, eGFR, and additional antihypertensive treatment.

<sup>b</sup> Adjustment for UACR, sodium intake, and additional antihypertensive treatment variations (In addition to parameters included in Model 1).

ARB, angiotensin II receptor blocker; CI, confidence interval; eGFR, estimated glomerular filtration rate; OR, odds ratio; SBP, systolic blood pressure.

**Table IIb supplementary data.** Predictors of aldosterone breakthrough at 1 year (i.e. serum aldosterone level increase greater than 10% over baseline values) versus serum aldosterone decrease > 10% below baseline values, in the subgroup of participants with an increase of sodium intake estimated by Mann's formula from baseline to 1 yr, using multivariate logistic regression analysis.

| <b>VARIABLES</b>                                                                | <b>Model 1<sup>a</sup></b>                                                                 | <b>Model 2<sup>b</sup></b> |
|---------------------------------------------------------------------------------|--------------------------------------------------------------------------------------------|----------------------------|
|                                                                                 | OR (95% CI)                                                                                | OR (95% CI)                |
| <b>Increase sodium intake estimated by Mann's formula from baseline to 1 yr</b> |                                                                                            |                            |
|                                                                                 | Increase of serum aldosterone levels > 10% from baseline values (n=65 participants [22%])  |                            |
|                                                                                 | vs                                                                                         |                            |
|                                                                                 | Decrease of serum aldosterone levels > 10% from baseline values (n=187 participants [63%]) |                            |
| <b>Baseline characteristics</b>                                                 |                                                                                            |                            |
| Serum aldosterone (log mg/dL)                                                   | <b>0.24 [0.14-0.40]</b>                                                                    | <b>0.26 [0.14-0.47]</b>    |
| SBP (mmHg)                                                                      | <b>1.02 [1.00-1.04]</b>                                                                    | 1.01 [0.98-1.04]           |
| Serum potassium (mmol/l)                                                        | 0.76 [0.41-1.48]                                                                           | 0.85 [0.38-1.89]           |
| <b>Significant decrease from baseline to 1 yr</b>                               |                                                                                            |                            |
| SBP (mmHg)                                                                      | –                                                                                          | <b>1.03 [1.01-1.05]</b>    |
| Na intake (Mann's formula, log mmol/d)                                          | –                                                                                          | 1.10 [0.21-5.86]           |
| Serum potassium (mmol/l)                                                        | –                                                                                          | 0.74 [0.36-1.56]           |
| eGFR (log ml/min/1.73 m <sup>2</sup> )                                          | –                                                                                          | <b>13.68 [2.70-69.26]</b>  |
| <b>ARB treatment</b>                                                            |                                                                                            |                            |
| Losartan <i>versus</i> Telmisartan                                              | –                                                                                          | <b>2.40 [1.19-4.85]</b>    |

<sup>a</sup>After adjustment for baseline age, sex, ethnicity, smoking status, HbA1c, sodium intake, UACR, eGFR, and additional antihypertensive treatment.

<sup>b</sup>With adjustment for HbA1c, UACR, sodium intake, and additional antihypertensive treatment variations (in addition to parameters included in Model 1).

ARB, angiotensin II receptor blocker; eGFR, estimated glomerular filtration rate; SBP, systolic blood pressure.
